# Supplementary material
Source: PubMed Central journal article supplement (PMC7290718)
Supplement: jamaophthalmol-138-819-s001.pdf [file jamaophthalmol-138-819-s001.pdf]

## Supplementary Online Content

Roizenblatt M, Marin VDGB, Grupenmacher AT, et al. Association of weight-adjusted caffeine and  $\beta$ -blocker use with ophthalmology fellow performance during simulated vitreoretinal microsurgery. *JAMA Ophthalmol*. Published online June 11, 2020. doi:10.1001/jamaophthal.2020.1971

**eTable 1.** Median Differences Between Days 1 and 2 With Corresponding *P*-value for the Eyesi Surgical-Generated Score

**eTable 2.** Median Differences Between Days 1 and 2 With the Corresponding *P*-value for the Eyesi Tremor-Specific Task Score

**eTable 3.** Median Difference Between Days 1 and 2 With the Corresponding *P*-value for the Intraocular Trajectory (Odometer)

**eTable 4.** Median Difference Between Days 1 and 2 With the Corresponding *P*-value for the Total Time for Task Completion

This supplementary material has been provided by the authors to give readers additional information about their work.

**eTable 1.** Median Differences Between Days 1 and 2 With Corresponding *P*-value for the Eyesi Surgical-Generated Score

| SCORE<br>Median differences ( <i>P</i> -values) | Day 2<br>Low-dose propranolol | Day 2<br>High-dose propranolol | Day 2<br>Neutralizing Dose |
|-------------------------------------------------|-------------------------------|--------------------------------|----------------------------|
| Day 1<br>Low-dose caffeine                      | <b>-53 (.009)</b>             | <b>-41 (.001)</b>              | -36 (.77)                  |
| Day 1<br>High-dose caffeine                     | <b>-50 (.009)</b>             | <b>-65 (.001)</b>              | -11 (.54)                  |
| Day 1<br>Neutralizing dose                      | <b>-51 (.01)</b>              | <b>-53 (.004)</b>              | -22 (.97)                  |

*P* value by the Dunn-Bonferroni test of multiple comparisons after Friedman's test.

Difference: day 1 - day 2

**eTable 2.** Median Differences Between Days 1 and 2 With the Corresponding *P*-value for the Eyesi Tremor-Specific Task Score

| SCORE<br>Median differences ( <i>P</i> -value) | Day 2<br>Low-dose propranolol | Day 2<br>High-dose propranolol | Day 2<br>Neutralizing Dose |
|------------------------------------------------|-------------------------------|--------------------------------|----------------------------|
| Day 1<br>Low-dose caffeine                     | <b>-12 (.009)</b>             | <b>-10 (.02)</b>               | -17 (.08)                  |
| Day 1<br>High-dose caffeine                    | <b>-14 (.01)</b>              | <b>-15 (.01)</b>               | -18 (.10)                  |
| Day 1<br>Neutralizing dose                     | <b>-16 (.03)</b>              | <b>-19 (.01)</b>               | -19 (.52)                  |

*P*-value by the Dunn-Bonferroni test of multiple comparisons after Friedman's test.  
Difference: day 1 - day 2

**eTable 3.** Median Difference Between Days 1 and 2 With the Corresponding *P*-value for the Intraocular Trajectory (Odometer)

| ODOMETER<br>Median differences ( <i>P</i> -value) | Day 2<br>Low-dose propranolol | Day 2<br>High-dose propranolol | Day 2<br>Neutralizing Dose |
|---------------------------------------------------|-------------------------------|--------------------------------|----------------------------|
| Day 1<br>Low-dose caffeine                        | <b>179.3 mm (.048)</b>        | 178.2 mm (.36)                 | 88.2 mm (1.00)             |
| Day 1<br>High-dose caffeine                       | <b>292.1 mm (&lt;.001)</b>    | <b>290.1 mm (.004)</b>         | 124.7 mm (.36)             |
| Day 1<br>Neutralizing dose                        | <b>166.8 mm (.03)</b>         | 86.3 mm (.27)                  | -20.4 mm (1.00)            |

*P*-value by the Dunn-Bonferroni test of multiple comparisons after Friedman's test.  
Difference: day 1 - day 2. Millimeters (mm)

**eTable 4.** Median Difference Between Days 1 and 2 With the Corresponding *P*-value for the Total Time for Task Completion

| TIME<br>Median differences ( <i>P</i> -values) | Day 2<br>Low-dose propranolol | Day 2<br>High-dose propranolol | Day 2<br>Neutralizing<br>Dose |
|------------------------------------------------|-------------------------------|--------------------------------|-------------------------------|
| Day 1<br>Low-dose caffeine                     | <b>2.3 min (.048)</b>         | <b>2.1 min (.01)</b>           | <b>1.5 min (.048)</b>         |
| Day 1<br>High-dose caffeine                    | <b>2.0 min (.048)</b>         | <b>2.0 min (.009)</b>          | 1.3 min (.07)                 |
| Day 1<br>Neutralizing dose                     | 0.7 min (.77)                 | 1.1 min (.36)                  | 1.0 min (.97)                 |

*P*-value by Dunn-Bonferroni test of multiple comparisons after Friedman's test.  
Difference: day 1 - day 2. Minutes (min)
